# Supplementary material for: The influence of affect on HPV vaccine decision making in an HPV vaccine naïve college student population
Source: PubMed Central journal article supplement — Prev Med Rep. 2020 Aug 29;20:101195. doi: 10.1016/j.pmedr.2020.101195 (PMC7498828; doi:10.1016/j.pmedr.2020.101195), 2020-08-29
Supplement: mmc1.pdf [file mmc1.pdf]

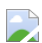

# Thoughts and Feelings about the HPV Vaccine

---

## Welcome to the Thoughts and Feelings about HPV Vaccine Survey!

**Thank you for your interest in this survey! The Thoughts and Feelings about HPV Vaccine survey is a study exploring attitudes towards the Human Papillomavirus (or HPV) vaccine.**

**After this page, you will read an informed consent document and indicate whether or not you would like to participate in this online survey. If you decide to participate, it will take around 30 minutes and you will receive a \$10 Amazon gift card upon completion. Please note that the gift card will be sent to your email address and may take a week to get to you.**

**While you are taking the survey, we ask that you read each question carefully and give the answer that most closely represents how you feel. There are no incorrect responses -- we are interested in your opinions. The survey responses are completely anonymous, so feel free to answer honestly.**

**When you are ready to get started, click on the "next" button at the bottom of the page.**

---

**We are interested in your awareness of HPV (Human Papillomavirus) and the HPV vaccine. Please choose the best answers for the questions below.**

**27) How much would you say you know about genital warts?\***

Nothing at all   A little   A moderate amount   Quite a lot   I prefer not to answer

**28) How much would you say you know about oral cancer?\***

Nothing at all   A little   A moderate amount   Quite a lot   I prefer not to answer

**29) How much would you say you know about anal cancer?\***

Nothing at all   A little   A moderate amount   Quite a lot   I prefer not to answer

**30) How much would you say you know about cervical cancer?\***

Nothing at all A little A moderate amount Quite a lot I prefer not to answer

**31) Have you heard of the human papillomavirus (HPV) before today?\***

Yes

No

I don't know

I prefer not to answer

**32) Do you think the HPV vaccine causes health problems for women?\***

Yes

No

I don't know

I prefer not to answer

**33) Do you think the HPV vaccine causes health problems for men?\***

Yes

No

I don't know

I prefer not to answer

**34) Do you think someone can get HPV from having oral sex?\***

Yes

No

I don't know

I prefer not to answer

**35) Do you think someone can get HPV from having vaginal sex?\***

Yes

- No
- I don't know
- I prefer not to answer

**36) Do you think someone can get HPV from having anal sex?\***

- Yes
- No
- I don't know
- I prefer not to answer

**37) Do you think HPV can cause genital herpes?**

- Yes
- No
- I don't know

**38) Do you think HPV is rare among people in the United States?\***

- Yes
- No
- I don't know
- I prefer not to answer

**39) Do you think HPV is rare among people ages 18-26?\***

- Yes
- No
- I don't know
- I prefer not to answer

**40) Do you think HPV can cause genital warts?\***

- Yes
- No
- I don't know

I prefer not to answer

**41) Do you think HPV can cause oral cancer?\***

Yes

No

I don't know

I prefer not to answer

**42) Do you think HPV can cause anal cancer?\***

Yes

No

I don't know

I prefer not to answer

**43) Do you think HPV can cause cervical cancer?**

Yes

No

I don't know

I prefer not to answer

**44) Do you think HPV can cause penile cancer?\***

Yes

No

I don't know

I prefer not to answer

**45) Do you think only people who have sex with many partners get HPV?\***

Yes

No

I don't know

I prefer not to answer

**46) Have you ever heard of the HPV vaccine before today?\***

Yes

No

I don't know

I prefer not to answer

---

**Please answer the next few questions based on your own beliefs about the HPV vaccine.****47) Without the vaccine, what do you think is the chance that you will ever get genital warts?**

No chance    Low chance    Moderate chance    High chance    I don't know

**48) Without the vaccine, what do you think is the chance that you will ever get anal cancer?**

No chance    Low chance    Moderate chance    High chance    I don't know

**49) Without the vaccine, what do you think is the chance that you will ever get oral cancer?**

No chance    Low chance    Moderate chance    High chance    I don't know

**50) Without the vaccine, what do you think is the chance that you will ever get cervical cancer?**

No chance    Low chance    Moderate chance    High chance    I don't know

---

**These questions are about your chances of getting cancer or genital warts. Please respond by answering whether you are more likely, less likely, or equally likely to get sick than people in your peer group.**

**58) Compared to other people of your age and gender, how likely are you to get genital warts caused by HPV?\***

Less likely than average      Equally likely      More likely than average      I don't know      I prefer not to answer

**59) Compared to other people of your age and gender, how likely are you to get cancer caused by HPV?\***

Less likely than average      Equally likely      More likely than average      I don't know      I prefer not to answer

---

**This next set of questions is asking how you often you would like to feel different emotions. Even if you are not feeling any of these emotions right now, please answer how often you would like to feel each one if you could choose.**

**102) How much would you IDEALLY like to feel enthusiastic?\***

Not at all      A little      Somewhat      Quite a bit      All of the time      I prefer not to answer

**103) How much would you IDEALLY like to feel excited?\***

Not at all      A little      Somewhat      Quite a bit      All of the time      I prefer not to answer

**104) How much would you IDEALLY like to feel elated?\***

Not at all      A little      Somewhat      Quite a bit      All of the time      I prefer not to answer

**109) How much would you IDEALLY like to feel calm?\***

Not at all      A little      Somewhat      Quite a bit      All of the time      I prefer not to answer

**111) How much would you IDEALLY like to feel relaxed?\***

Not at all      A little      Somewhat      Quite a bit      All of the time      I prefer not to answer

**112) How much would you IDEALLY like to feel serene?\***

Not at all      A little      Somewhat      Quite a bit      All of the time      I prefer not to answer

---

**These questions are concerned with your personal feelings about the HPV-related illness. Please select the answer that corresponds most accurately to how you feel about each question.**

**156) How worried are you about getting genital warts at some point in your life?\***

Not at all    A little    Somewhat    Very    Extremely    I prefer not to answer

**157) How afraid are you of getting genital warts at some point in your life?\***

Not at all    A little    Somewhat    Very    Extremely    I prefer not to answer

**158) How worried are you of getting HPV-related cancer at some point in your life?\***

Not at all    A little    Somewhat    Very    Extremely    I prefer not to answer

**159) How afraid are you of getting HPV-related cancer at some point in your life?\***

Not at all    A little    Somewhat    Very    Extremely    I prefer not to answer

---

**These questions are concerned with your feelings about the HPV vaccine. Please indicate how much you feel each emotion when thinking about getting the HPV vaccine.**

**190) When you think of getting the HPV VACCINE do you feel happy?\***

Not at all    A little    Somewhat    Quite a bit    Extremely    I prefer not to answer

**191) When you think of getting the HPV VACCINE, do you feel delighted?\***

Not at all    A little    Somewhat    Quite a bit    Extremely    I prefer not to answer

**192) When you think of getting the HPV VACCINE, do you feel disgusted?\***

Not at all    A little    Somewhat    Quite a bit    Extremely    I prefer not to answer

**193) When you think of getting the HPV VACCINE, do you feel angry?\***

Not at all    A little    Somewhat    Quite a bit    Extremely    I prefer not to answer

**194) When you think of getting the HPV VACCINE, do you feel satisfied?\***

Not at all    A little    Somewhat    Quite a bit    Extremely    I prefer not to answer

**195) When you think of getting the HPV VACCINE, do you feel relaxed?\***

Not at all    A little    Somewhat    Quite a bit    Extremely    I prefer not to answer

**196) When you think of getting the HPV VACCINE, do you feel annoyed?\***

Not at all    A little    Somewhat    Quite a bit    Extremely    I prefer not to answer

**197) When you think of getting the HPV VACCINE, do you feel sad?\***

Not at all    A little    Somewhat    Quite a bit    Extremely    I prefer not to answer

**198) When you think of getting the HPV VACCINE, do you feel embarrassed?\***

Not at all    A little    Somewhat    Quite a bit    Extremely    I prefer not to answer

**199) When you think of getting the HPV VACCINE, do you feel afraid?\***

Not at all    A little    Somewhat    Quite a bit    Extremely    I prefer not to answer

**200) When you think of getting the HPV VACCINE, do you feel ashamed?\***

Not at all    A little    Somewhat    Quite a bit    Extremely    I prefer not to answer

---
